1 **Ribosomal protein RACK1 facilitates efficient translation**  
2 **of poliovirus and other viral IRESs**

3 **Ethan LaFontaine\*<sup>1</sup>, Clare M. Miller\*<sup>1</sup>, Natasha Permaul<sup>1</sup>, Alex G. Johnson<sup>2</sup>,**  
4 **Elliot T. Martin<sup>1</sup>, Gabriele Fuchs<sup>1,3</sup>**

5 \* These authors contributed equally to this work

6

7 <sup>1</sup> Department of Biological Sciences, University at Albany, Albany, NY, 12222

8 <sup>2</sup> Department of Chemical and Systems Biology, Stanford University, Stanford,  
9 CA, 94305

10 <sup>3</sup> The RNA Institute, University at Albany, NY, 12222

## 11 **Abstract**

12 Viruses have evolved various strategies to ensure efficient translation using host  
13 cell ribosomes and translation factors. In addition to cleaving translation initiation  
14 factors required for host cell translation, poliovirus (PV) uses an internal  
15 ribosome entry site (IRES) to bypass the need for these translation initiation  
16 factors. Recent studies also suggest that viruses have evolved to exploit specific  
17 ribosomal proteins to enhance translation of their viral proteins. The ribosomal  
18 protein receptor for activated C kinase 1 (RACK1), a protein of the 40S ribosomal  
19 subunit, was previously shown to mediate translation of the 5' cricket paralysis  
20 virus and hepatitis C virus IRESs. Here we found that while translation of a PV  
21 dual-luciferase reporter shows only a moderate dependence on RACK1, PV  
22 translation in the context of a viral infection is drastically reduced. We observed  
23 significantly reduced poliovirus plaque size and a delayed host cell translational  
24 shut-off suggesting that loss of RACK1 increases the length of the virus life cycle.  
25 Our findings further illustrate the involvement of the cellular translational  
26 machinery in PV infection and how viruses usurp the function of specific  
27 ribosomal proteins.

## 28 **Introduction**

29 Since viruses rely on cellular translation factors and ribosomes for translation of  
30 viral proteins, viruses and host cells battle for these critical resources. Viral  
31 double-stranded RNA activates interferon-induced, double-stranded RNA-  
32 activated protein kinase (PKR), which phosphorylates translation initiation factor  
33 eIF2 $\alpha$  leading to inhibition of viral and cellular translation (1–3). To prevent eIF2 $\alpha$   
34 phosphorylation and translational shut-off, viruses target PKR. Some viral  
35 proteins directly bind to PKR to prevent its activity, other viruses degrade PKR or  
36 alter its subcellular localization (4–9). To efficiently compete for ribosomes, many  
37 viruses use translation initiation mechanisms distinct from cellular mRNA  
38 translation initiation, which uses canonical cap-dependent translation. All cellular  
39 mRNAs are transcribed in the nucleus, where they are also capped and  
40 polyadenylated. After export into the cytoplasm, the 5' m<sup>7</sup>GpppN cap is bound by  
41 the cap binding protein eukaryotic initiation factor 4E (eIF4E) and the polyA-tail is  
42 bound by the polyA binding protein (PABP). Through binding of the scaffolding  
43 protein eIF4G to eIF4E and PABP, the mRNA is circularized. With help of the  
44 RNA helicase eIF4A, the 40S ribosomal subunit in complex with eIF2 and eIF3  
45 scans the 5' untranslated region (UTR) in an ATP-dependent manner until the  
46 start codon is reached and recognized. After 60S ribosomal subunit joining and  
47 GTP hydrolysis by eIF5B elongation can proceed. To prevent cap-dependent  
48 translation poliovirus (PV) and other viruses of the *Picornaviridae* family target  
49 these eIFs. Specifically, PV proteases 2A and 3C cleave eIF4G, and PABP and  
50 eIF5B, respectively (10–16). Cleavage of these essential translation factors

51 shuts-off host cell translation, while PV uses an internal ribosome entry site  
52 (IRES) for translation of the viral polyprotein that does not rely on these  
53 translation factors (16, 17). Viruses not only prevent global translation inhibition  
54 in the host cell, they also employ strategies that specifically decrease translation  
55 of cellular mRNAs.

56 In addition to targeting translation initiation factors, several viruses have shown  
57 direct usage of ribosomal proteins to increase their viral translation. Lee et al.  
58 performed an siRNA screen and identified eight ribosomal proteins including  
59 eL40, that are not required for cell viability, but negatively affect Vesicular  
60 Stomatitis Virus (VSV) and other related viruses (18). Ribosomal protein eL40  
61 was dispensable for viruses that use IRES-mediated translation, but regulated a  
62 subset of cellular mRNAs with diverse functions (18). In contrast to eL40, eS25, a  
63 protein located near the head of the 40S ribosomal subunit, mediates translation  
64 of viruses that initiate translation using IRESs (19, 20). eS25 directly interacts  
65 with the hepatitis C virus (HCV) and the intergenic (IGR) cricket paralysis virus  
66 (CrPV) IRESs in cryo-EM structures (21–24) and is required for high-affinity  
67 binding of the 40S ribosomal subunit to the CrPV IRES (19). Further, eS25 not  
68 only facilitates translation of other IRESs such as encephalomyocarditis virus  
69 (EMCV) and PV, but also regulates translation of cellular IRES-containing  
70 mRNAs (20). More recently, another ribosomal protein, receptor for activated C  
71 kinase 1 (RACK1) has been shown to be exploited by different viruses.  
72 RACK1 is a core ribosomal protein (25) that belongs to the tryptophan-aspartate  
73 repeat (WD-repeat) protein family. The seven-bladed  $\beta$ -propeller structure of

74 RACK1 is located near the mRNA exit tunnel where it makes contacts with the  
75 ribosomal RNA through lysine and arginine residues and neighboring ribosomal  
76 proteins (26–28). RACK1 is often termed a scaffolding protein and has been  
77 implicated in a variety of biological function on and off the ribosome. In addition  
78 to binding to its eponym protein kinase C  $\beta$ II (PKC $\beta$ II) and being involved in  
79 cellular signaling via Src protein-tyrosine kinase (29–31), RACK1 has been  
80 shown to interact with the microRNA machinery (32), bind eIF6 to regulate the  
81 60S ribosomal subunit (33) and regulate ribosome-associated quality control (34,  
82 35). At the level of tissues and organisms, RACK1 regulates axonal growth (36),  
83 neural tube closure in *Xenopus laevis* (37), and is essential for development in  
84 mice (38), *Drosophila melanogaster* (39) and *Arabidopsis thaliana* (40, 41), but  
85 appears to be dispensable in single cell organisms such as yeast (27). Directly  
86 and/or indirectly, RACK1 also influences translation of cellular mRNAs. The  
87 *Saccharomyces cerevisiae* RACK1 homolog, Asc1, facilitates efficient translation  
88 of mRNAs containing a short open reading frame (42), while in mammalian cells,  
89 RACK1 appears to stimulate cell proliferation in a PKC $\beta$ II-dependent manner (30,  
90 43, 44).

91 At the intersection of cellular signaling and translational regulation, RACK1  
92 represents a critical regulatory target for many viruses. Vaccinia virus, which  
93 belongs to the poxviruses and contains a dsDNA genome, but replicates  
94 exclusively in the cytoplasm, encodes a kinase that phosphorylates a flexible  
95 loop in RACK1 (45). Through phosphorylation, this RACK1 loop is now  
96 negatively charged, which allows for translation of the poxvirus polyA-leader

97 containing mRNAs (45). In plants, where polyA-leader sequences are commonly  
98 found, this RACK1 loop contains several glutamic acid residues, hence poxvirus  
99 evolution likely rediscovered efficient translation of polyA-leaders through  
100 phosphorylation of RACK1. Viruses from the *Dicistroviridae* family encode two  
101 polyproteins, and translation of each polyprotein is mediated by an IRES (46). In  
102 contrast to eS25, RACK1 is dispensable for translation of the CrPV IGR IRES,  
103 but its loss inhibits the translation of both the 5' IRES of CrPV as well as the HCV  
104 IRES (47).

105 The finding that RACK1 facilitates efficient translation of the HCV IRES prompted  
106 us to explore if the need for RACK1 is more broadly conserved. Using a RACK1  
107 knockout cell line generated by CRISPR-Cas9 genome editing (45), we first  
108 tested translation using dual-luciferase constructs. We found that HCV, EMCV  
109 and PV IRES translation are all reduced in cells lacking RACK1. Although the  
110 effect on PV translation in the context of the dual-luciferase reporter is moderate,  
111 loss of RACK1 causes a significant decrease in the PV plaque size. This  
112 decrease is due to attenuated translation prior to and post translational shut-off,  
113 suggesting that the virus life cycle lengthened in cells lacking RACK1.

114

## 115 **Results**

### 116 *RACK1-FLAG is incorporated into polysomes*

117 To investigate the function of mammalian RACK1 in translation, we established a  
118 functional rescue by expressing RACK1-FLAG in HAP1-derived CRISPR  
119 genome edited RACK1 knockout cell line RACK1 KO #1 described by Jha et al.

120 (45) using lentiviral transduction (48). HAP1 cells are a near-haploid human cell  
121 line derived from chronic myelogenous leukemia KBM-7 cells (49). RACK1 was  
122 undetectable in RACK1 KO #1 and RACK1 KO #2 cell lines. Following lentiviral  
123 transduction of RACK1-FLAG into RACK1 KO #1 cells, RACK1 levels were  
124 partially restored (figure 1A). To examine incorporation of FLAG-tagged RACK1  
125 into translating ribosomes rather than other high molecular weight cytosolic  
126 complexes, we performed polysome analysis by sucrose gradient  
127 ultracentrifugation. When cell lysate is treated with the translation elongation  
128 inhibitor cycloheximide, translation will be stalled. Upon sucrose gradient  
129 ultracentrifugation, the translating ribosomes, polysomes, are separated from the  
130 ribosomal subunits. When sucrose gradient analysis was performed on wildtype  
131 HAP1 and RACK1-FLAG expressing RACK1 KO #1 cells, no major differences in  
132 the overall polysome profile were detected (figures 1B and 1C).

133 We found that RACK1-FLAG co-sedimented in the polysomal fractions 9-14  
134 (figure 1C, left panel) with eS25 and eL13a, ribosomal proteins of the 40S and  
135 60S ribosomal subunits, respectively. Although this result suggested that  
136 RACK1-FLAG was incorporated into polysomes, we could not exclude that it  
137 sedimented in heavy sucrose fractions because it formed aggregates. To further  
138 validate that RACK1-FLAG indeed was incorporated into polysomes, we treated  
139 cell lysate with puromycin. Puromycin is a tRNA analog, which stalls translation  
140 elongation and releases the growing peptide chain. When cell lysate treated with  
141 puromycin is heated to 37°C, the two ribosomal subunits are separated, and the  
142 mRNA is released (50). Puromycin treatment alters the sedimentation pattern for

143 ribosomal proteins, which now sediment in lighter sucrose fractions where the  
144 ribosomal protein subunits are found. Following puromycin treatment, RACK1-  
145 FLAG now sedimented in the lighter sucrose gradient fractions 3 and 4 (figure  
146 1C, right panel), where it again co-sediments with eS25. Taken together, these  
147 results indicate that RACK1-FLAG is incorporated into translating ribosomes and  
148 likely fully functional.

149

#### 150 *RACK1 mediates translation of viral IRESs*

151 Loss of RACK1 has been previously shown to inhibit translation of the HCV and  
152 CrPV 5' IRES (47) raising the possibility that RACK1 generally facilitates viral  
153 IRES-mediated translation. To test this hypothesis, we used dicistronic luciferase  
154 reporters, in which translation of the *Renilla* luciferase uses canonical cap-  
155 dependent translation initiation, while translation of the Firefly luciferase is  
156 mediated by a viral IRES (figure 2A). We tested the importance of RACK1 for  
157 translation of four viral IRESs, specifically PV, EMCV, HCV and CrPV intergenic  
158 IRESs. These IRESs represent four major types of viral IRESs and use different  
159 mechanisms for translation initiation (4). None of these viral IRESs use the cap-  
160 binding function of eIF4E, although a recent study showed that eIF4E stimulates  
161 the helicase activity of eIF4A on the PV IRES independent of its cap-binding  
162 function (52). In contrast to PV, neither the EMCV nor the HCV IRES use a  
163 scanning mechanism but instead directly recruit the ribosome to the start codon  
164 (53). While the EMCV IRES requires all canonical translation initiation factors  
165 except for eIF4E, translation initiation of the HCV IRES uses a more limited set of



166 translation initiation factors. In agreement with previous observations, loss of  
167 RACK1 did not alter translation of the CrPV intergenic (IGR) IRES, but inhibited  
168 translation of the HCV IRES (figures 2B and 2C, and (47)). In addition, we  
169 observed that RACK1 also facilitated translation of the EMCV and PV IRESs  
170 (figures 2B and 2C). Expression of RACK1-FLAG in RACK1 knockout cells  
171 partially rescued the defect in IRES-mediated translation (figure 2C). The  
172 observed rescue approximately corresponded to the expression level of RACK1-  
173 FLAG (figures 2C and 1A). Taken together, these data support the need for  
174 RACK1 to facilitate translation of HCV, EMCV and PV IRESs, but not CrPV IGR  
175 IRES.

176

#### 177 *PV plaque diameters are decreased in cells lacking RACK1*

178 To test if the reduction of PV IRES-mediated translation impacts the virus during  
179 infection, we performed PV plaque assays in wildtype, RACK1 KO #1, and  
180 RACK1-FLAG add-back cells and measured both PV plaque diameter and  
181 plaque numbers. Following infection with the Mahoney strain of PV, we observed  
182 a significant decrease in the PV plaque size in cells lacking RACK1 as compared  
183 to wildtype and RACK1-FLAG add-back cells (figure 3A). In contrast, the number  
184 of PV plaques was not significantly altered in any of the cell lines (figure 3B).  
185 Together, these data indicate that infectious particles are similarly efficient at  
186 establishing an infection independent of cellular RACK1 levels, however, the  
187 infectious cycle and virus spread may be impaired.

188

189 *Loss of RACK1 impairs PV translation during the entire virus life cycle*

190 Upon PV infection, the PV genome must be translated to give rise to the viral  
191 proteins, which include the viral proteases 2A and 3C. When levels of 2A and 3C  
192 are sufficiently high, these viral proteases cleave translation factors eIF4G and  
193 PABP, which shuts off translation in the host cell. Our observation that PV  
194 plaques are reduced in cells lacking RACK1 made us wonder whether loss of  
195 RACK1 prolonged the viral life cycle and delayed host-cell translation shut-off. To  
196 test whether translational shut-off was delayed in RACK1 KO cells, we performed  
197 <sup>35</sup>S pulse-labeling experiments in mock-infected and PV-infected cells at a  
198 multiplicity of infection (MOI) of 1. When newly synthesized proteins were  
199 metabolically labeled 3 hours 5 minutes post infection and lysates resolved by  
200 SDS-PAGE we observed that wildtype and RACK1-FLAG add-back cells started  
201 to show the characteristic PV banding pattern observed in the positive control of  
202 cells infected at MOI = 10 and harvested at the same time (figure 4A) (16). In  
203 contrast, the protein pattern in the RACK1 KO cell lines was similar to the pattern  
204 in the mock-infected cells, in that cellular proteins were metabolically labeled,  
205 and viral proteins are absent. These data indicate that the time until PV-induced  
206 translational shut-off of the host cell was indeed delayed (figure 4A). We next  
207 asked if PV translation also remained at lower levels in RACK1 KO cells post  
208 translational shut-off. To address this question, we monitored translation of a PV-  
209 Luciferase replicon (PV-Luc) during the initial phase of translation and translation  
210 during viral replication. Instead of the viral structural proteins, the PV-Luc replicon  
211 encodes a luciferase open reading frame fused to the PV non-structural proteins.

212 Early during infection, luciferase measurements reveal initial translation of the  
213 replicon. Once negative strand synthesis has occurred, the PV genome will start  
214 replicating, which will result in greater translation of the replicon and largely  
215 increased luciferase production. We transfected *in vitro* transcribed PV-Luc RNA  
216 into wildtype, RACK1 KO #1 and RACK1-FLAG cells, harvested protein lysates  
217 3, 5, 7, and 9 hours post transfection and measured luciferase levels by  
218 luminescence. As expected, we observed robust luciferase production in wildtype  
219 cells, while levels of luciferase in RACK1 KO #1 remained more than 10-fold  
220 lower (figure 4B, top panel). Consistent with our previous results, RACK1-FLAG  
221 expression in the KO cell line partially rescued luciferase expression. To help  
222 distinguish viral translation and replication stages, we immediately treated cells  
223 with guanidine hydrochloride, a drug that inhibits viral replication (54). Thus, the  
224 measured amount of luciferase produced in these experiments only represents  
225 protein production prior to viral replication. Although luciferase levels in RACK1  
226 KO#1 and RACK1-FLAG cells were comparable at 3 hours post transfection,  
227 luciferase levels in the RACK1-FLAG cell line increased over time, reaching  
228 levels comparable to luciferase levels in wildtype cells, while cells lacking RACK1  
229 KO#1 failed to accumulate significant levels of luciferase (figure 4B, middle  
230 panel). When cells were treated with the translation inhibitor cycloheximide  
231 immediately after PV-Luc reporter transfection, luciferase levels measured in all  
232 cells were at background levels (figure 4B, lower panel), indicating that  
233 translation of the viral genome had been completely blocked.  
234

235 Taken together, this data indicates that RACK1 not only mediates translation of  
236 the HCV IRES but is also critical for efficient translation of the EMCV and PV  
237 IRESs using dicistronic luciferase assays. Cells lacking RACK1 also show a  
238 reduced PV plaque size, likely due to inefficient PV translation prior to as well as  
239 post host cell translational shut-off, which further extends the PV life cycle.

240

## 241 **Discussion**

242 The ribosomal protein RACK1 interacts with numerous cellular proteins and has  
243 been thought to function as a scaffolding protein that connects cellular signaling  
244 pathways with the ribosome and the translation machinery (55). In addition, it has  
245 been previously shown that RACK1 is important for translation of the HCV IRES  
246 (47). Although HCV, PV and EMCV all use IRESs for translation initiation, the PV  
247 and EMCV IRESs rely on more translation factors than the HCV IRES. These  
248 translation factors could compensate for the function of RACK1, which prompted  
249 us to test whether RACK1 is also needed for translation of other viral IRESs. We  
250 thus employed RACK1 knockout cells generated by CRISPR-Cas9 mediated  
251 genome editing (45) and transduced them with lentiviruses to express RACK1-  
252 FLAG, which was incorporated into translating ribosomes (figure 1). In contrast to  
253 others who have reported that RACK1 depletion reduces cap-dependent  
254 translation (30, 56), we do not observe major changes in cap-dependent  
255 translation in RACK1 KO cells ((45), figure 4A and unpublished data). It is  
256 possible that the contrasting observations are due to cell line specific differences.  
257 While HAP1 cells are derived from the chronic myelogenous leukemia (CML) cell

258 line KBM-7, all studies that found that RACK1 influenced cap-dependent and -  
259 independent translation were performed in HEK293, HEK293T, and HeLa cells  
260 (30, 31, 56). Since RACK1 stimulates global translation in a PKC $\beta$ II-dependent  
261 manner (30, 43), potentially higher PKC $\beta$ II expression levels found in HEK293  
262 and HeLa cells or other cell line-specific differences might explain the opposing  
263 effect on translation ((57), [https://www.proteinatlas.org/ENSG00000166501-  
264 PRKCB/cell](https://www.proteinatlas.org/ENSG00000166501-PRKCB/cell)).

265 To test the involvement of RACK1 in IRES-mediated translation beyond CrPV  
266 and HCV IRESs, we used dicistronic luciferase constructs (figure 2A) containing  
267 the EMCV and PV IRESs, two other well-characterized viral IRESs. We found  
268 that RACK1 not only facilitates translation of the HCV IRES, but also of the  
269 EMCV and PV IRESs (figure 2). In agreement with previous work by Majzoub et  
270 al., translation of the CrPV IGR IRES occurred in a RACK-independent manner  
271 (47). To examine if RACK1 also plays a critical role during PV infection, we next  
272 infected wildtype, RACK1 KO and RACK1-FLAG expressing cells with the  
273 Mahoney strain of PV and performed plaque assays. While loss of RACK1  
274 caused significantly smaller PV plaques (figure 3A), almost all infectious particles  
275 are able to start a successful infection (figure 3B). This finding indicates that  
276 RACK1 is partially dispensable for PV IRES-mediated translation, but also  
277 suggests that RACK1 specifically influences the translation efficiency of the PV  
278 IRES-containing RNA. Several groups have found RACK1 to regulate autophagy  
279 by directly interacting with Atg5 (58) and by enhancing Atg14L-Beclin 1-Vps34-  
280 Vps15 complex formation (59). However, neither Atg5 nor Beclin 1 impact PV

281 proliferation (60) making it unlikely that the observed phenotype is due to  
282 changes in the autophagy pathway.  
283 Using metabolic labeling and translation of a PV-Luc reporter we further showed  
284 that PV translation is attenuated in cells lacking RACK1 (figure 4) both pre and  
285 post translational shut-off (figure 4B). Decreased PV translation early during the  
286 virus life cycle lengthens the time until critical quantities of poliovirus proteases  
287 2A and 3C are produced. These two proteases cleave translation factors eIF4G  
288 and PABP, respectively, cause host cell translation shut-off and enable viral  
289 replication (11, 14, 61). In cells lacking RACK1, translational shut-off of the host  
290 cell takes longer compared to RACK1-expressing cells (figure 4A). Further,  
291 RACK1 is not only critical prior to translational shut-off, but our PV-Luc reporter  
292 assay also showed that cells lacking RACK1 do not efficiently replicate the PV  
293 genome, while cells expressing RACK1 start replication 3h post transfection  
294 (figure 4B, top panel). Although RACK1 is not essential for PV translation, it  
295 enhances the translation efficiency of PV and other viruses, indicating RACK1  
296 acts as a pro-viral host protein.

297

298 Interestingly, our findings are reminiscent of ribosomal protein eS25, previously  
299 shown to mediate both viral and cellular IRES-mediated translation (19, 20). Both  
300 eS25 and RACK1 have a greater impact on HCV IRES translation, reducing  
301 IRES activity by about 75%, while translation of the PV IRES is less sensitive to  
302 eS25 and RACK1 levels. Curiously, the EMCV IRES appears to depend more on  
303 RACK1 than eS25, since loss of RACK1 causes a 60% decrease in IRES

304 activity, while loss of eS25 only decreases EMCV IRES activity by 40%.  
305 Similarly, though, shRNA-mediated depletion of eS25 resulted in a 2-fold  
306 decrease in PV viral titers (20), which indicates that loss of eS25 might also  
307 lengthen the viral life cycle prior and post translational shut-off, however, no PV  
308 plaque size of a direct virus plaque assay was reported. In contrast to RACK1,  
309 eS25 reduction was found to inhibit all viral IRESs, including the CrPV IGR IRES  
310 (19). Both RACK1 and eS25 are ribosomal proteins that are usurped by viruses  
311 to enhance viral translation.  
312  
313 Our findings may be explained by three potential models for how RACK1 acts on  
314 PV translation. First, RACK1 could directly enhance the affinity of the ribosome  
315 for the PV IRES, for example by stabilizing IRES docking. Indeed, Landry et al.  
316 showed that the CrPV IRES is unable to bind to 40S ribosomal subunits lacking  
317 eS25 (19). Since the 40S ribosomal subunit is not directly recruited by the PV  
318 IRES but involves a scanning mechanism, *in vitro* ribosome affinity can only be  
319 measured in the presence of purified translation initiation factors, which is quite  
320 challenging. However, 40S ribosomal subunits lacking RACK1 directly bind the  
321 HCV IRES with an affinity similar to wildtype 40S ribosomal subunits (48).  
322 Further, ribosomes lacking RACK1 are also able to form 80S ribosomes at high  
323 concentrations of magnesium (48) indicating that RACK1 is neither involved in  
324 40S nor 80S:HCV IRES complex formation. Although we cannot exclude a direct  
325 contribution of RACK1 to 40S binding or 80S complex formation with the EMCV

326 and PV IRESs, we believe that the evidence for the HCV IRES suggests that  
327 RACK1 might employ a mechanism distinct from eS25.  
328 Second, RACK1 might directly or indirectly affect the structure of the  
329 ribosome:PV IRES complex, for example by stabilizing a translation-favorable  
330 IRES conformation. Such structural rearrangement has been observed for the  
331 HCV IRES (24) where domain 2 of the HCV IRES, which interacts with eS25,  
332 undergoes a ~55 Å movement. This movement switches the 40S ribosomal  
333 subunit from an open conformation for mRNA loading to a closed conformation  
334 with the initiator tRNA tightly bound to the P-site (24). Although domain II of the  
335 HCV IRES does not contribute to the binding affinity of the HCV IRES to the 40S  
336 ribosomal subunit (21, 62, 63), eS25 has been shown to have a critical function  
337 for HCV IRES translation (19, 23). The increased size of the PV IRES, which is  
338 almost double the size of the HCV IRES, and the complex translation initiation  
339 pathway of the PV IRES involving ribosome scanning and several more  
340 translation initiation factors has prevented the acquisition of a cryo-EM structure  
341 to test these models. Thus, in cell structure probing techniques such as selective  
342 2'-hydroxyl acylation analyzed by primer extension (SHAPE) coupled with the  
343 replication inhibitor guanidine hydrochloride, may be required to provide valuable  
344 insights into the PV-IRES ribosome structure in the future (64).  
345 Third, RACK1 is not near the HCV IRES binding interface as revealed by the  
346 cryo-EM structure of the HCV IRES:40S complex, further indicating that RACK1  
347 unlikely affects IRES binding. In contrast to the CrPV IGR IRES, both the 5' CrPV  
348 and HCV IRESs require eIF3, which has an extensive binding surface on the 40S



349 ribosomal subunit. Translation initiation factor eIF3 is composed of 13 protein  
350 subunits and binds to a large surface of the 40S ribosomal subunit (65, 66).  
351 While several eIF3 subunits are essential for its function, other factors such as  
352 eIF3H and eIF3J are dispensable (47, 67). Of these dispensable functions, loss  
353 of eIF3J mimics the RACK1 loss-of-function phenotype on HCV and CrPV 5'  
354 IRES translation (47), possibly by altering the conformation of the mRNA entry  
355 channel (48). Again, the lack of a cryo-EM structure of the large PV IRES bound  
356 to the 40S ribosomal subunits prevents us from using structural data to gain  
357 insights into the mechanism of RACK1 on PV translation. Instead, biological  
358 approaches such as crosslinking-immunoprecipitation (CLIP) on PV-infected  
359 cells will have to be used to identify potential interactions between RACK1 and  
360 the PV IRES (68).

361

362 Although it is unclear how RACK1 facilitates PV translation and if the way  
363 RACK1 is used by PV is identical to HCV translation, the similarities to eS25  
364 roles in IRES-mediated translation are striking. While the two ribosomal proteins  
365 appear to use distinct mechanisms, both might alter the conformation of the  
366 mRNA entry channel and/or the transitioning between the open and closed 40S  
367 conformation (24, 47). These findings further raise the question which cellular  
368 RNAs are translationally regulated by RACK1 and eS25 and whether the mRNA  
369 targets are distinctly different. The observations that neither RACK1 nor eS25 are  
370 largely involved in canonical cap-dependent translation (19, 45) suggests that the  
371 specific cellular mRNAs relying on these proteins might be translationally highly

372 regulated. Hertz et al. found that cellular IRES-containing mRNAs are less  
373 efficiently translated in eS25-depleted cells (20), indicating a role of eS25 in cap-  
374 independent translation. However, given the indirect interaction of RACK1 with  
375 the HCV IRES via eIF3, further studies will be needed to determine if RACK1  
376 also facilitates cap-independent translation or if it acts a translational enhancer of  
377 specific mRNAs (69).

378

379 Ribosomal protein RACK1 not only enhances translation of HCV and the CrPV 5'  
380 IRES, it also enhances translation of other viral IRES-containing RNAs such as  
381 EMCV and PV. PV-infected cells lacking RACK1 inefficiently translate the viral  
382 RNA, which lengthens the virus life cycle. These results suggest that targeting  
383 RACK1 could be used as an antiviral strategy, but more research into the cellular  
384 mRNAs that rely on RACK1 for translation is needed.

385

## 386 **Materials and Methods**

### 387 **Cell culture**

388 HAP1 cells purchased from Horizon USA (C859), HAP1-derived RACK1  
389 knockout cell lines #1 and #2 (45), and RACK1-FLAG addback cell lines were  
390 cultured in Iscove's modified Dulbecco's medium (IMDM; Corning) supplemented  
391 with 5% fetal bovine serum and 2 mM L-glutamine. HEK293FT cells (Thermo  
392 Scientific) grown in DMEM (Gibco) supplemented with 5% fetal bovine serum  
393 and 2 mM L-glutamine were used to generate lentivirus particles for cellular

394 transductions. Cultures were confirmed negative for mycoplasma using DAPI  
395 staining.

396

### 397 **Viral-Transduction of RACK1 Add-Back Cell Line**

398 RACK1 cDNA was cloned with primers Forward  
399 5'ATGACTGAGCAGATGACCCTTCG3' and Reverse  
400 5'CTAGCGTGTGCCAARGGTCACC3' from HeLa cells. RACK1-FLAG  
401 expression construct was PCR-amplified from cDNA with Phusion polymerase  
402 (NEB) with primers CACCATGACTGAGCAGATGACCCTTCGTG  
403 TTATCACTTATCGTCGTCATCCTTGTAATCGCGTGTGCCAATGGTCACCTGC  
404 CAC and cloned into pENTR D-TOPO vector. Using Gateway LR Clonase II  
405 (Invitrogen) RACK1-FLAG was cloned into pLenti CMV Puro DEST (w118-1)  
406 (Addgene plasmid #17452) following the manufacturer's protocol. RACK1-FLAG  
407 was expressed in RACK1 KO#1 cell line following lentiviral transduction. For  
408 lentivirus transduction, HEK293 FT cells (ThermoFisher) were co-transfected  
409 with plasmids pCMV-dR8.2 dvpr (gag-pol; Addgene #8455), pCMV-VSV-G  
410 (envelope; Addgene #8454), pAdVantage (Promega E1711) and pLenti RACK1-  
411 FLAG using Fugene HD (Promega). The lentivirus-containing media was filtered  
412 through a 0.45 µm PES filter. Following addition of 8 µg/ml protamine sulfate the  
413 supernatant was used to transduce RACK1 KO #1 cells. Cultures transduced  
414 overnight were selected with 1 µg/ml puromycin (InvivoGen) to generate a pool of  
415 stably expressing RACK1-FLAG cells. Selection was complete when  
416 untransduced RACK1 KO #1 cells had died.

417

## 418 **Polysome Profile Analysis**

419 Polysome profile analyses were performed on a 10 cm dish of approximately  
420 80%-90% confluency in 10-50% sucrose gradients containing either in 500 mM  
421 KCl, 15 mM Tris-HCl pH 7.5, 15 mM MgCl<sub>2</sub>, 1 mg/ml heparin (Sigma) and 100  
422 µg/ml cycloheximide (Sigma) or 500 mM KCl; 15 mM Tris-HCl, pH 7.5; 2 mM  
423 MgCl<sub>2</sub>; 1 mg/ml heparin (Sigma), 2 mM puromycin as previously described by  
424 Fuchs et al. (70).

425

## 426 **Immunoblotting**

427 Total protein lysate was harvested in RIPA buffer (70), and proteins  
428 separated by 12% SDS-PAGE were transferred to a nitrocellulose membrane  
429 (GE Healthcare) for 70 Vh at 4°C. Following transfer, membranes were blocked  
430 in 1% milk in PBS for 30 minutes at room temperature, washed three times in  
431 phosphate buffered saline with 0.1% (w/v) Tween 20 (PBS/T) for 10 minutes  
432 each and placed in primary antibody overnight at 4°C. Primary antibodies used  
433 were rabbit RACK1 (1:2000 dilution, Cell Signaling #4716S), FLAG-HRP (1:1000,  
434 Sigma-Aldrich, #F2555), L13a (1:1000, Cell Signaling #2765S), actin (1:1000,  
435 Sigma-Aldrich #A2066) and RPS25 (1:1000, abcam, #ab102940). Following  
436 overnight incubation, membranes were washed three times in PBS/T for 10  
437 minutes each. For visualization of the HRP-conjugated FLAG antibody,  
438 membranes were directly imaged on a BioRad ChemiDoc XRS+. For all other  
439 antibodies, membranes were incubated in a 1:10,000 dilution of goat anti-rabbit

440 secondary (Jackson) in 5% milk and PBS/T. Membranes were washed a final 3  
441 times in PBS/T for 10 minutes each prior to being imaged on the BioRad  
442 ChemiDoc XRS+.

443

#### 444 **Dual-Luciferase Assays**

445 Bicistronic DNA constructs with *Renilla* and Firefly luciferase sequences  
446 flanked a viral IRES sequence. Viral IRESs evaluated were hepatitis C virus  
447 (HCV), cricket paralysis virus (CrPV), poliovirus (PV), and encephalomyocarditis  
448 virus (EMCV) (all gifts from Peter Sarnow, Stanford, USA). Approximately 20,000  
449 cells of each cell line were seeded in the wells of a 96-well plate. For each  
450 construct, 100 ng DNA was transfected using lipofectamine 3000 reagent in  
451 accordance with the manufacturer's instructions (ThermoFisher). After 24 hours,  
452 cells were lysed in 50  $\mu$ l 1X passive lysis buffer (Promega) and 20  $\mu$ l sample was  
453 read for 10s in a Glomax 20/20 luminometer (Promega) using the dual-luciferase  
454 assay reagent (Promega #E1910). Averages of the Firefly over *Renilla* ratio of at  
455 least three independent replicates and the standard error of the mean were  
456 calculated and plotted after normalization to wildtype cells (100%, dotted line).  
457 Following normalization to wildtype cells, statistical analysis was performed by  
458 Student's t-test (two-tailed, unequal variance) and p-values are indicated in  
459 figure.

460

#### 461 **Poliovirus Plaque Assays**

462            Approximately 2 million cells were seeded into 60 mm dishes the day prior  
463 to infection. Cells were washed in PBS+ (PBS supplemented with 10 mg/ml  
464 MgCl<sub>2</sub> and 10 mg/ml CaCl<sub>2</sub>) and 100 µl diluted poliovirus was used to infect cells  
465 for 30 minutes at 37°C, 5% CO<sub>2</sub>. Cells were covered with 1% bactoagar-media  
466 mixture (DMEM supplemented with 5% fetal bovine serum and 2 mM L-  
467 glutamine). After 40 hours at 37°C, 5% CO<sub>2</sub>, the agar layer and cells were fixed  
468 and stained for 30 minutes at RT with a crystal violet solution containing 1%  
469 formaldehyde, crystal violet and 20% ethanol. PV plaque sizes were determined  
470 by measuring the plaque diameter in pixels using ImageJ (NIH). Poliovirus  
471 plaques were counted, and average and standard error of the mean of three  
472 independent replicates were plotted. P-values were determined via Student's t-  
473 test (two-tailed, unequal variance).

474

475

#### 476 **<sup>35</sup>S metabolic labeling**

477 Wildtype, RACK1 KO #1 and #2, and RACK1-FLAG expressing cells were either  
478 mock-infected or infected with PV Mahoney at MOI = 1 (MOI = 10 for positive  
479 control) for 30 minutes at 37°C, 5% CO<sub>2</sub>. Cells were incubated for 3 hours and 5  
480 minutes at 37°C, 5% CO<sub>2</sub>, then media was exchanged for DMEM lacking  
481 cysteine and methionine (Corning®). After starvation for 30 min, cells were  
482 metabolically labeled for 10 min with 10 µCi EasyTag™ EXPRESS<sup>35</sup>S Protein  
483 Labeling Mix (Perkin Elmer). Total cell lysate was harvested in RIPA buffer (70)

484 and separated by 10% SDS-PAGE. The dried gel was exposed to a phosphor-  
485 screen (GE) and scanned using a Typhoon scanner (GE).

486

#### 487 **Poliovirus Reporter Translation Assay**

488 The luciferase-expressing, poliovirus-derived replicon plasmid prib(+)*Luc-Wt* was  
489 linearized with *Mlu* I (71) and *in vitro* transcribed with HiScribe T7 Quick High  
490 Yield RNA Synthesis Kit (NEB) as previously described (52). Wildtype, RACK1  
491 KO #1 and #2, and RACK1-FLAG expressing cells were trypsinized,  
492 resuspended and gently pelleted. For each transfection reaction, approximately  
493  $3 \times 10^6$  cells were resuspended in 500  $\mu$ l of media and reverse transfected in  
494 suspension with Lipofectamine 3000 following the manufacturer's transfection  
495 protocol for a 6-well plate. Immediately after transfection, three aliquots of 250  $\mu$ l  
496 of transfected cells were mixed with 500  $\mu$ l of IMDM media each. To inhibit  
497 translation, one aliquot of transfected cells was treated with 25  $\mu$ g/ml  
498 cycloheximide (Sigma). In a second aliquot, PV replicon replication was inhibited  
499 with 2 mM guanidine hydrochloride. Aliquots of 150  $\mu$ l were removed 3, 5, 7 and  
500 9 h post transfection and luminescence was measured with luciferase assay  
501 reagent (Promega) using a Glomax luminometer (Promega).

502

#### 503 **Acknowledgements**

504 We thank Peter Sarnow (Stanford) his kind gift of viral IRES plasmids. The  
505 prib(+)*Luc-Wt* plasmid was a kind gift from Raul Andino (UCSF). We further  
506 thank Sangeetha Selvam and Cara Pager for discussions and for critically

507 reading the manuscript. This work was supported by start-up funds from the  
508 University at Albany, State University of New York, and the University at Albany  
509 Faculty Research Awards Program (FRAP) (to GF).

510

511 **Conflict of interest:** The authors declare that they have no conflict of interest  
512 with the contents of this article. The content is solely the responsibility of the  
513 authors.

514

515 **Author contributions:** EL, CMM, and GF designed the study and wrote the  
516 paper. CMM performed RACK1 immunoblot and quantification, and 35S pulse-  
517 labeling experiment EL performed polysome and PV plaque assay experiments.  
518 EL and NP performed the dual luciferase assays, and EL and GF performed the  
519 cell-based PV-Luc replicon experiments. AJ cloned the RACK1-FLAG construct  
520 for lentivirus transduction, and ETM performed statistical analysis. All authors  
521 analyzed the data and approved the final version of the paper.



## 522 **References**

- 523 1. Wek RC, Jiang H-Y, Anthony TG. 2006. Coping with stress: eIF2 kinases  
524 and translational control. *Biochem Soc Trans* 34:7–11.
- 525 2. Pakos-Zebrucka K, Koryga I, Mnich K, Ljubic M, Samali A, Gorman AM.  
526 2016. The integrated stress response. *EMBO Rep* 17:1374–1395.
- 527 3. Wek RC. 2018. Role of eIF2 $\alpha$  Kinases in Translational Control and  
528 Adaptation to Cellular Stress. *Cold Spring Harb Perspect Biol* 10:a032870.
- 529 4. Clarke PA, Schwemmler M, Schickinger J, Hilse K, Clemens MJ. 1991.  
530 Binding of Epstein-Barr virus small RNA EBER-1 to the double-stranded  
531 RNA-activated protein kinase DAI. *Nucleic Acids Res* 19:243–8.
- 532 5. Sharp T V, Schwemmler M, Jeffrey I, Laing K, Mellor H, Proud CG, Hilse K,  
533 Clemens MJ. 1993. Comparative analysis of the regulation of the  
534 interferon-inducible protein kinase PKR by Epstein-Barr virus RNAs EBER-  
535 1 and EBER-2 and adenovirus VAI RNA. *Nucleic Acids Res* 21:4483–90.
- 536 6. Ghadge GD, Swaminathan S, Katze MG, Thimmapaya B. 1991. Binding of  
537 the adenovirus VAI RNA to the interferon-induced 68-kDa protein kinase  
538 correlates with function. *Proc Natl Acad Sci U S A* 88:7140–4.
- 539 7. Langland JO, Pettiford S, Jiang B, Jacobs BL. 1994. Products of the  
540 porcine group C rotavirus NSP3 gene bind specifically to double-stranded  
541 RNA and inhibit activation of the interferon-induced protein kinase PKR. *J*  
542 *Viro* 68:3821–9.
- 543 8. Black TL, Safer B, Hovanessian A, Katze MG. 1989. The cellular 68,000-  
544 Mr protein kinase is highly autophosphorylated and activated yet

- 545 significantly degraded during poliovirus infection: implications for  
546 translational regulation. *J Virol* 63:2244–51.
- 547 9. Hebner CM, Wilson R, Rader J, Bidder M, Laimins LA. 2006. Human  
548 papillomaviruses target the double-stranded RNA protein kinase pathway.  
549 *J Gen Virol* 87:3183–3193.
- 550 10. Ventoso I, MacMillan SE, Hershey JW, Carrasco L. 1998. Poliovirus 2A  
551 proteinase cleaves directly the eIF-4G subunit of eIF-4F complex. *FEBS*  
552 *Lett* 435:79–83.
- 553 11. Svitkin Y V, Gradi A, Imataka H, Morino S, Sonenberg N. 1999. Eukaryotic  
554 initiation factor 4GII (eIF4GII), but not eIF4GI, cleavage correlates with  
555 inhibition of host cell protein synthesis after human rhinovirus infection. *J*  
556 *Virol* 73:3467–72.
- 557 12. Kuyumcu-Martinez NM, Joachims M, Lloyd RE. 2002. Efficient cleavage of  
558 ribosome-associated poly(A)-binding protein by enterovirus 3C protease. *J*  
559 *Virol* 76:2062–74.
- 560 13. Kuyumcu-Martinez NM, Van Eden ME, Younan P, Lloyd RE. 2004.  
561 Cleavage of poly(A)-binding protein by poliovirus 3C protease inhibits host  
562 cell translation: a novel mechanism for host translation shutoff. *Mol Cell*  
563 *Biol* 24:1779–90.
- 564 14. Bonderoff JM, Larey JL, Lloyd RE. 2008. Cleavage of poly(A)-binding  
565 protein by poliovirus 3C proteinase inhibits viral internal ribosome entry  
566 site-mediated translation. *J Virol* 82:9389–99.
- 567 15. de Breyne S, Bonderoff JM, Chumakov KM, Lloyd RE, Hellen CUT. 2008.

- 568 Cleavage of eukaryotic initiation factor eIF5B by enterovirus 3C proteases.  
569 *Virology* 378:118–122.
- 570 16. White JP, Reineke LC, Lloyd RE. 2011. Poliovirus Switches to an eIF2-  
571 Independent Mode of Translation during Infection. *J Virol* 85:8884–8893.
- 572 17. Pelletier J, Sonenberg N. 1988. Internal initiation of translation of  
573 eukaryotic mRNA directed by a sequence derived from poliovirus RNA.  
574 *Nature* 334:320–325.
- 575 18. Lee AS-Y, Burdeinick-Kerr R, Whelan SPJ. 2013. A ribosome-specialized  
576 translation initiation pathway is required for cap-dependent translation of  
577 vesicular stomatitis virus mRNAs. *Proc Natl Acad Sci U S A* 110:324–9.
- 578 19. Landry DM, Hertz MI, Thompson SR. 2009. RPS25 is essential for  
579 translation initiation by the Dicistroviridae and hepatitis C viral IRESs.  
580 *Genes Dev* 2009/12/03. 23:2753–2764.
- 581 20. Hertz MI, Landry DM, Willis AE, Luo G, Thompson SR. 2013. Ribosomal  
582 protein s25 dependency reveals a common mechanism for diverse internal  
583 ribosome entry sites and ribosome shunting. *Mol Cell Biol* 33:1016–26.
- 584 21. Spahn CM, Kieft JS, Grassucci RA, Penczek PA, Zhou K, Doudna JA,  
585 Frank J. 2001. Hepatitis C virus IRES RNA-induced changes in the  
586 conformation of the 40s ribosomal subunit. *Science* (80- ) 291:1959–1962.
- 587 22. Nishiyama T, Yamamoto H, Uchiumi T, Nakashima N. 2007. Eukaryotic  
588 ribosomal protein RPS25 interacts with the conserved loop region in a  
589 dicistroviral intergenic internal ribosome entry site. *Nucleic Acids Res*  
590 35:1514–1521.

- 591 23. Muhs M, Yamamoto H, Ismer J, Takaku H, Nashimoto M, Uchiumi T,  
592 Nakashima N, Mielke T, Hildebrand PW, Nierhaus KH, Spahn CM. 2011.  
593 Structural basis for the binding of IRES RNAs to the head of the ribosomal  
594 40S subunit. *Nucleic Acids Res* 2011/03/08.
- 595 24. Yamamoto H, Collier M, Loerke J, Ismer J, Schmidt A, Hilal T, Sprink T,  
596 Yamamoto K, Mielke T, Bürger J, Shaikh TR, Dabrowski M, Hildebrand  
597 PW, Scheerer P, Spahn CMT. 2015. Molecular architecture of the  
598 ribosome-bound Hepatitis C Virus internal ribosomal entry site RNA.  
599 *EMBO J* 34:3042–58.
- 600 25. Gerbasi VR, Weaver CM, Hill S, Friedman DB, Link AJ. 2004. Yeast Asc1p  
601 and Mammalian RACK1 Are Functionally Orthologous Core 40S  
602 Ribosomal Proteins That Repress Gene Expression. *Mol Cell Biol*  
603 24:8276–8287.
- 604 26. Sengupta J, Nilsson J, Gursky R, Spahn CMT, Nissen P, Frank J. 2004.  
605 Identification of the versatile scaffold protein RACK1 on the eukaryotic  
606 ribosome by cryo-EM. *Nat Struct Mol Biol* 11:957–962.
- 607 27. Coyle SM, Gilbert W V., Doudna JA. 2009. Direct Link between RACK1  
608 Function and Localization at the Ribosome In Vivo. *Mol Cell Biol* 29:1626–  
609 1634.
- 610 28. Anger AM, Armache J-P, Berninghausen O, Habeck M, Subklewe M,  
611 Wilson DN, Beckmann R. 2013. Structures of the human and Drosophila  
612 80S ribosome. *Nature* 497:80–5.
- 613 29. Chang BY, Chiang M, Cartwright CA. 2001. The interaction of Src and

- 614 RACK1 is enhanced by activation of protein kinase C and tyrosine  
615 phosphorylation of RACK1. *J Biol Chem* 276:20346–56.
- 616 30. Dobrikov MI, Dobrikova EY, Gromeier M. 2018. Ribosomal RACK1:Protein  
617 Kinase C  $\beta$ II Phosphorylates Eukaryotic Initiation Factor 4G1 at S1093 To  
618 Modulate Cap-Dependent and -Independent Translation Initiation. *Mol Cell*  
619 *Biol* 38.
- 620 31. Dobrikov MI, Dobrikova EY, Gromeier M. 2018. Ribosomal RACK1:Protein  
621 Kinase C  $\beta$ II Modulates Intramolecular Interactions between Unstructured  
622 Regions of Eukaryotic Initiation Factor 4G (eIF4G) That Control eIF4E and  
623 eIF3 Binding. *Mol Cell Biol* 38.
- 624 32. Jannot G, Bajan S, Giguère NJ, Bouasker S, Banville IH, Piquet S,  
625 Hutvagner G, Simard MJ. 2011. The ribosomal protein RACK1 is required  
626 for microRNA function in both *C. elegans* and humans. *EMBO Rep*  
627 12:581–586.
- 628 33. Ceci M, Gaviraghi C, Gorrini C, Sala LA, Offenhäuser N, Carlo Marchisio  
629 P, Biffo S. 2003. Release of eIF6 (p27BBP) from the 60S subunit allows  
630 80S ribosome assembly. *Nature* 426:579–584.
- 631 34. Matsuda R, Ikeuchi K, Nomura S, Inada T. 2014. Protein quality control  
632 systems associated with no-go and nonstop mRNA surveillance in yeast.  
633 *Genes to Cells* 19:1–12.
- 634 35. Sundaramoorthy E, Leonard M, Mak R, Liao J, Fulzele A, Bennett EJ.  
635 2017. ZNF598 and RACK1 Regulate Mammalian Ribosome-Associated  
636 Quality Control Function by Mediating Regulatory 40S Ribosomal

- 637 Ubiquitylation. *Mol Cell* 65:751-760.e4.
- 638 36. Kershner L, Welshhans K. 2017. RACK1 is necessary for the formation of  
639 point contacts and regulates axon growth. *Dev Neurobiol* 77:1038–1056.
- 640 37. Wehner P, Shnitsar I, Urlaub H, Borchers A. 2011. RACK1 is a novel  
641 interaction partner of PTK7 that is required for neural tube closure.  
642 *Development* 138:1321–1327.
- 643 38. Volta V, Beugnet A, Gallo S, Magri L, Brina D, Pesce E, Calamita P,  
644 Sanvito F, Biffo S. 2013. RACK1 depletion in a mouse model causes  
645 lethality, pigmentation deficits and reduction in protein synthesis efficiency.  
646 *Cell Mol Life Sci* 70:1439–1450.
- 647 39. Kadrmas JL, Smith MA, Pronovost SM, Beckerle MC. 2007.  
648 Characterization of RACK1 function in *Drosophila* development. *Dev Dyn*  
649 236:2207–2215.
- 650 40. Guo J, Chen J-G. 2008. RACK1 genes regulate plant development with  
651 unequal genetic redundancy in *Arabidopsis*. *BMC Plant Biol* 8:108.
- 652 41. Guo J, Wang S, Valerius O, Hall H, Zeng Q, Li J-F, Weston DJ, Ellis BE,  
653 Chen J-G. 2011. Involvement of *Arabidopsis* RACK1 in Protein Translation  
654 and Its Regulation by Abscisic Acid. *PLANT Physiol* 155:370–383.
- 655 42. Thompson MK, Rojas-Duran MF, Gangaramani P, Gilbert W V. 2016. The  
656 ribosomal protein Asc1/RACK1 is required for efficient translation of short  
657 mRNAs. *Elife* 5.
- 658 43. Grosso S, Volta V, Sala LA, Vietri M, Marchisio PC, Ron D, Biffo S. 2008.  
659 PKC $\beta$ II modulates translation independently from mTOR and through

- 660 RACK1. *Biochem J* 415:77–85.
- 661 44. Romano N, Veronese M, Manfrini N, Zolla L, Ceci M. 2019. Ribosomal  
662 RACK1 promotes proliferation of neuroblastoma cells independently of  
663 global translation upregulation. *Cell Signal* 53:102–110.
- 664 45. Jha S, Rollins MG, Fuchs G, Procter DJ, Hall EA, Cozzolino K, Sarnow P,  
665 Savas JN, Walsh D. 2017. Trans-kingdom mimicry underlies ribosome  
666 customization by a poxvirus kinase. *Nature* 546.
- 667 46. Hertz MI, Thompson SR. 2011. Mechanism of translation initiation by  
668 Dicistroviridae IGR IRESs. *Virology* 411:355.
- 669 47. Majzoub K, Hafirassou ML, Meignin C, Goto A, Marzi S, Fedorova A,  
670 Verdier Y, Vinh J, Hoffmann JA, Martin F, Baumert TF, Schuster C, Imler J-  
671 L. 2014. RACK1 Controls IRES-Mediated Translation of Viruses. *Cell*  
672 159:1086–1095.
- 673 48. Johnson AG, Lapointe CP, Wang J, Corsepilus NC, Choi J, Fuchs G,  
674 Puglisi JD. 2019. RACK1 on and off the ribosome. *bioRxiv* 582635.
- 675 49. Carette JE, Raaben M, Wong AC, Herbert AS, Obernosterer G, Mulherkar  
676 N, Kuehne AI, Kranzusch PJ, Griffin AM, Ruthel G, Dal Cin P, Dye JM,  
677 Whelan SP, Chandran K, Brummelkamp TR. 2011. Ebola virus entry  
678 requires the cholesterol transporter Niemann-Pick C1. *Nature* 477:340–3.
- 679 50. Blobel G, Sabatini D. 1971. Dissociation of mammalian polyribosomes into  
680 subunits by puromycin. *Proc Natl Acad Sci U S A* 68:390–394.
- 681 51. Balvay L, Rifo RS, Ricci EP, Decimo D, Ohlmann T. 2009. Structural and  
682 functional diversity of viral IRESes. *Biochim Biophys Acta - Gene Regul*

- 683 Mech 1789:542–557.
- 684 52. Avanzino BC, Fuchs G, Fraser CS. 2017. Cellular cap-binding protein,  
685 eIF4E, promotes picornavirus genome restructuring and translation. Proc  
686 Natl Acad Sci U S A 114.
- 687 53. Kieft JS. 2008. Viral IRES RNA structures and ribosome interactions.  
688 Trends Biochem Sci2008/05/13. 33:274–283.
- 689 54. Powers CD, Miller BA, Kurtz H, Ackermann WW. 1969. Specific effect of  
690 guanidine in the programming of poliovirus inhibition of deoxyribonucleic  
691 acid synthesis. J Virol 3:337–42.
- 692 55. Nielsen MH, Flygaard RK, Jenner LB. 2017. Structural analysis of  
693 ribosomal RACK1 and its role in translational control. Cell Signal 35:272–  
694 281.
- 695 56. Gallo S, Ricciardi S, Manfrini N, Pesce E, Oliveto S, Calamita P, Mancino  
696 M, Maffioli E, Moro M, Crosti M, Berno V, Bombaci M, Tedeschi G, Biffo S.  
697 2018. RACK1 Specifically Regulates Translation through Its Binding to  
698 Ribosomes. Mol Cell Biol 38.
- 699 57. Uhlen M, Fagerberg L, Hallstrom BM, Lindskog C, Oksvold P, Mardinoglu  
700 A, Sivertsson A, Kampf C, Sjostedt E, Asplund A, Olsson I, Edlund K,  
701 Lundberg E, Navani S, Szigartyo CA-K, Odeberg J, Djureinovic D,  
702 Takanen JO, Hober S, Alm T, Edqvist P-H, Berling H, Tegel H, Mulder J,  
703 Rockberg J, Nilsson P, Schwenk JM, Hamsten M, von Feilitzen K,  
704 Forsberg M, Persson L, Johansson F, Zwahlen M, von Heijne G, Nielsen J,  
705 Ponten F. 2015. Tissue-based map of the human proteome. Science (80- )



- 706 347:1260419–1260419.
- 707 58. Erbil S, Oral O, Mitou G, Kig C, Durmaz-Timucin E, Guven-Maiorov E,  
708 Gulacti F, Gokce G, Dengjel J, Sezerman OU, Gozuacik D. 2016. RACK1  
709 Is an Interaction Partner of ATG5 and a Novel Regulator of Autophagy. *J*  
710 *Biol Chem* 291:16753–65.
- 711 59. Zhao Y, Wang Q, Qiu G, Zhou S, Jing Z, Wang J, Wang W, Cao J, Han K,  
712 Cheng Q, Shen B, Chen Y, Zhang WJ, Ma Y, Zhang J. 2015. RACK1  
713 Promotes Autophagy by Enhancing the Atg14L-Beclin 1-Vps34-Vps15  
714 Complex Formation upon Phosphorylation by AMPK. *Cell Rep* 13:1407–  
715 1417.
- 716 60. Abernathy E, Mateo R, Majzoub K, van Buuren N, Bird SW, Carette JE,  
717 Kirkegaard K. 2019. Differential and convergent utilization of autophagy  
718 components by positive-strand RNA viruses. *PLOS Biol* 17:e2006926.
- 719 61. Gradi A, Svitkin Y V, Imataka H, Sonenberg N. 1998. Proteolysis of human  
720 eukaryotic translation initiation factor eIF4GII, but not eIF4GI, coincides  
721 with the shutoff of host protein synthesis after poliovirus infection. *Proc Natl*  
722 *Acad Sci U S A* 95:11089–94.
- 723 62. Kieft JS, Zhou K, Jubin R, Doudna JA. 2001. Mechanism of ribosome  
724 recruitment by hepatitis C IRES RNA. *Rna* 7:194–206.
- 725 63. Filbin ME, Vollmar BS, Shi D, Gonen T, Kieft JS. 2013. HCV IRES  
726 manipulates the ribosome to promote the switch from translation initiation  
727 to elongation. *Nat Struct Mol Biol* 20:150–8.
- 728 64. Burrill CP, Westesson O, Schulte MB, Strings VR, Segal M, Andino R.

- 729 2013. Global RNA structure analysis of poliovirus identifies a conserved  
730 RNA structure involved in viral replication and infectivity. *J Virol* 87:11670–  
731 83.
- 732 65. Hashem Y, des Georges A, Dhote V, Langlois R, Liao HY, Grassucci RA,  
733 Pestova T V, Hellen CUT, Frank J. 2013. Hepatitis-C-virus-like internal  
734 ribosome entry sites displace eIF3 to gain access to the 40S subunit.  
735 *Nature* 503:539–43.
- 736 66. Yamamoto H, Unbehaun A, Loerke J, Behrmann E, Collier M, Bürger J,  
737 Mielke T, Spahn CMT. 2014. Structure of the mammalian 80S initiation  
738 complex with initiation factor 5B on HCV-IRES RNA. *Nat Struct Mol Biol*  
739 21:721–7.
- 740 67. Johnson AG, Petrov AN, Fuchs G, Majzoub K, Grosely R, Choi J, Puglisi  
741 JD. 2018. Fluorescently-tagged human eIF3 for single-molecule  
742 spectroscopy. *Nucleic Acids Res* 46.
- 743 68. Gutiérrez-Escolano AL, Medina F, Racaniello VR, Del Angel RM. 1997.  
744 Differences in the UV-Crosslinking Patterns of the Poliovirus 5'-  
745 Untranslated Region with Cell Proteins from Poliovirus-Susceptible and -  
746 Resistant Tissues. *Virology* 227:505–508.
- 747 69. Gilbert W V. 2010. Alternative Ways to Think about Cellular Internal  
748 Ribosome Entry. *J Biol Chem* 285:29033–29038.
- 749 70. Fuchs G, Diges C, Kohlstaedt LA, Wehner KA, Sarnow P. 2011. Proteomic  
750 Analysis of Ribosomes: Translational Control of mRNA Populations by  
751 Glycogen Synthase GYS1. *J Mol Biol* 410:118–130.

- 752 71. Vogt DA, Andino R. 2010. An RNA element at the 5'-end of the poliovirus  
753 genome functions as a general promoter for RNA synthesis. PLoS Pathog  
754 6:e1000936.
- 755 72. Florez PM, Sessions OM, Wagner EJ, Gromeier M, Garcia-Blanco MA.  
756 2005. The Polypyrimidine Tract Binding Protein Is Required for Efficient  
757 Picornavirus Gene Expression and Propagation. J Virol 79:6172–6179.  
758

759 **Figure legends**

760 **Figure 1: RACK1-FLAG is incorporated into polysomes.** (A) RACK1 levels  
761 can be partially restored in RACK1 KO cells by expression of RACK1-FLAG.  
762 RACK1 levels in the different cell lines were quantified on the immunoblot  
763 analysis of RACK1 and the loading control actin. (B) Polysome trace of HAP1  
764 wildtype cells. Cell lysate was separated in 10-50% sucrose gradient and  
765 absorbance at 254 nm was measured. (C) Sucrose gradient analysis of FLAG-  
766 tagged RACK1 protein. In cells treated with the translation elongation inhibitor  
767 cycloheximide, RACK1-FLAG detected by immunoblotting using an anti-FLAG  
768 antibody co-sediments with polysomes (fractions 9-14). Upon treatment of cell  
769 lysate with the translation elongation puromycin, which separates actively  
770 translating ribosomes into the ribosomal subunits, RACK1-FLAG co-sediments  
771 with 40S ribosomal subunits in lighter sucrose gradient fractions (fractions 3-4).  
772 Immunoblot analysis for eS25 and ul13 are used as indicators for sedimentation  
773 of protein components of the small and large ribosomal subunits, respectively.  
774

775 **Figure 2: RACK1 facilitates translation of viral IRESs.** (A). Schematic  
776 overview of dual luciferase construct used in assays. The *Renilla* luciferase open  
777 reading frame is translated via m7G cap-dependent translation, while the viral  
778 IRES located in the intergenic region between the two coding sequences  
779 mediates translation of the Firefly luciferase. (B) Translation efficiency of CrPV,  
780 HCV, PV and EMCV dual luciferase reporters in both RACK1 KO cells  
781 normalized to HAP1 cells (dotted line). Error bars represent the standard error of

782 the mean of at least three independent experiments. \*\* p-value < 0.01; \*\*\* p-  
783 value < 0.001 (C) Translation of HCV, EMCV and PV IRESs correlates with  
784 RACK1 levels, but translation of CrPV IGR IRES is RACK1 independent. Ratios  
785 of Firefly/*Renilla* normalized to HAP1 ratios (dotted line). Error bars represent the  
786 standard error of the mean of at least three independent experiments. \* p-value <  
787 0.05; \*\* p-value < 0.01; \*\*\* p-value < 0.001

788

789 **Figure 3: PV plaque size is reduced in cells lacking RACK1**

790 (A) Analysis of PV plaque assays. PV plaques in RACK1 KO #1 cells are smaller  
791 compared to PV plaques in wildtype and RACK1-FLAG addback cells (left  
792 panel). Cells were infected at identical MOI; 42h post infection, cells were stained  
793 with crystal violet and poliovirus plaque diameters were measured. Error bars  
794 represent the standard deviation within the population of three independent  
795 experiments. The box indicates the data between the interquartile range (IQR)  
796 between the 25<sup>th</sup> and 75<sup>th</sup> percentile, the median is indicated by the thick line  
797 within the box. The thin vertical bars represent the minimum and maximum data  
798 points (Q1-1.5\*IQR, Q3+1.5\*IQR). Outliers in the wildtype cells are indicated by  
799 filled squares. (B) The number of visible poliovirus plaques does not differ  
800 between wildtype, RACK1 KO #1 and RACK1-FLAG cell lines. Cells were  
801 infected at identical MOI; 42h post infection, cells were stained with crystal violet  
802 and poliovirus plaques were counted. Error bars represent the standard error of  
803 the mean of at least three independent experiments.

804

805 **Figure 4: RACK1 is required for efficient PV translation prior and post host**  
806 **cell translational shut-off.** (A)  $^{35}\text{S}$  metabolic pulse labeling of uninfected (mock)  
807 and PV-infected cells. Cells were mock-infected or infected with PV Mahoney at  
808 MOI = 1 (MOI = 10 for positive control) and  $^{35}\text{S}$  pulse-labeled for 10 min at 3  
809 hours and 5 min post infection. Total protein lysates were separated in 10%  
810 SDS-PAGE and visualized by exposure to a phosphor-screen. Poliovirus-specific  
811 protein products P1, 3CD, and 2C are indicated (72).  
812 (B) Expression of a PV-Luc replicon is inefficient in cells lacking RACK1. HAP1,  
813 RACK1 KO #1, and RACK-1 FLAG cells were transfected with *in vitro* transcribed  
814 PV-Luc replicon RNA. An aliquot of cells was removed 3, 5, 7, and 9 hours post  
815 RNA transfection and Firefly luminescence was measured. Error bars represent  
816 the standard error of the mean of at least three independent experiments. Top  
817 panel: PV-Luc translation is decreased in cells lacking RACK1 during the  
818 replication phase. Middle panel: To limit the observation to the early translation  
819 phase, PV-Luc replication was inhibited with 2 mM guanidine hydrochloride  
820 immediately after RNA transfection. Bottom panel: Translation of all PV-Luc  
821 reporters is completely inhibited upon treatment with 25  $\mu\text{g}/\text{ml}$  cycloheximide.  
822 Cells were treated with cycloheximide immediately after RNA transfection.

## Figure 1

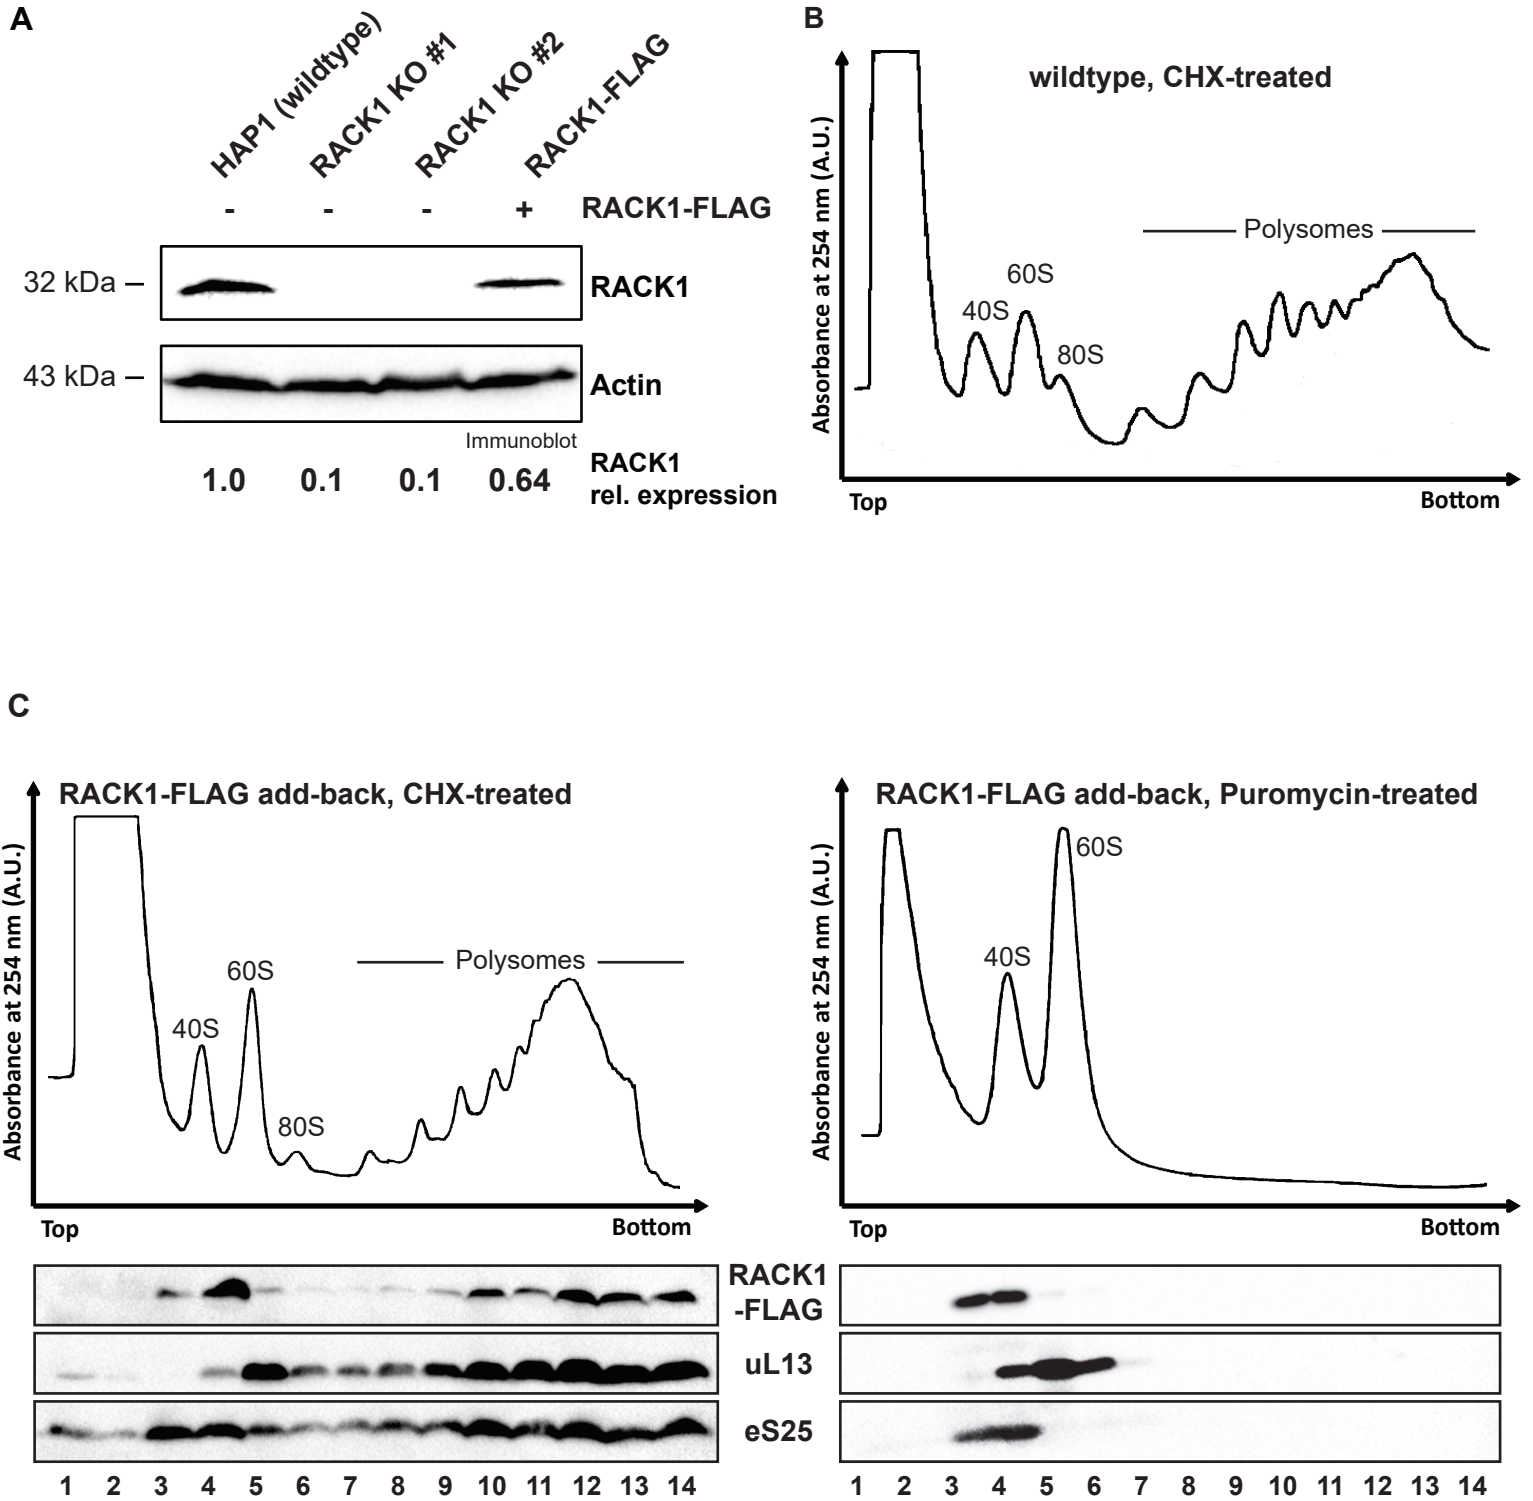

## Figure 2

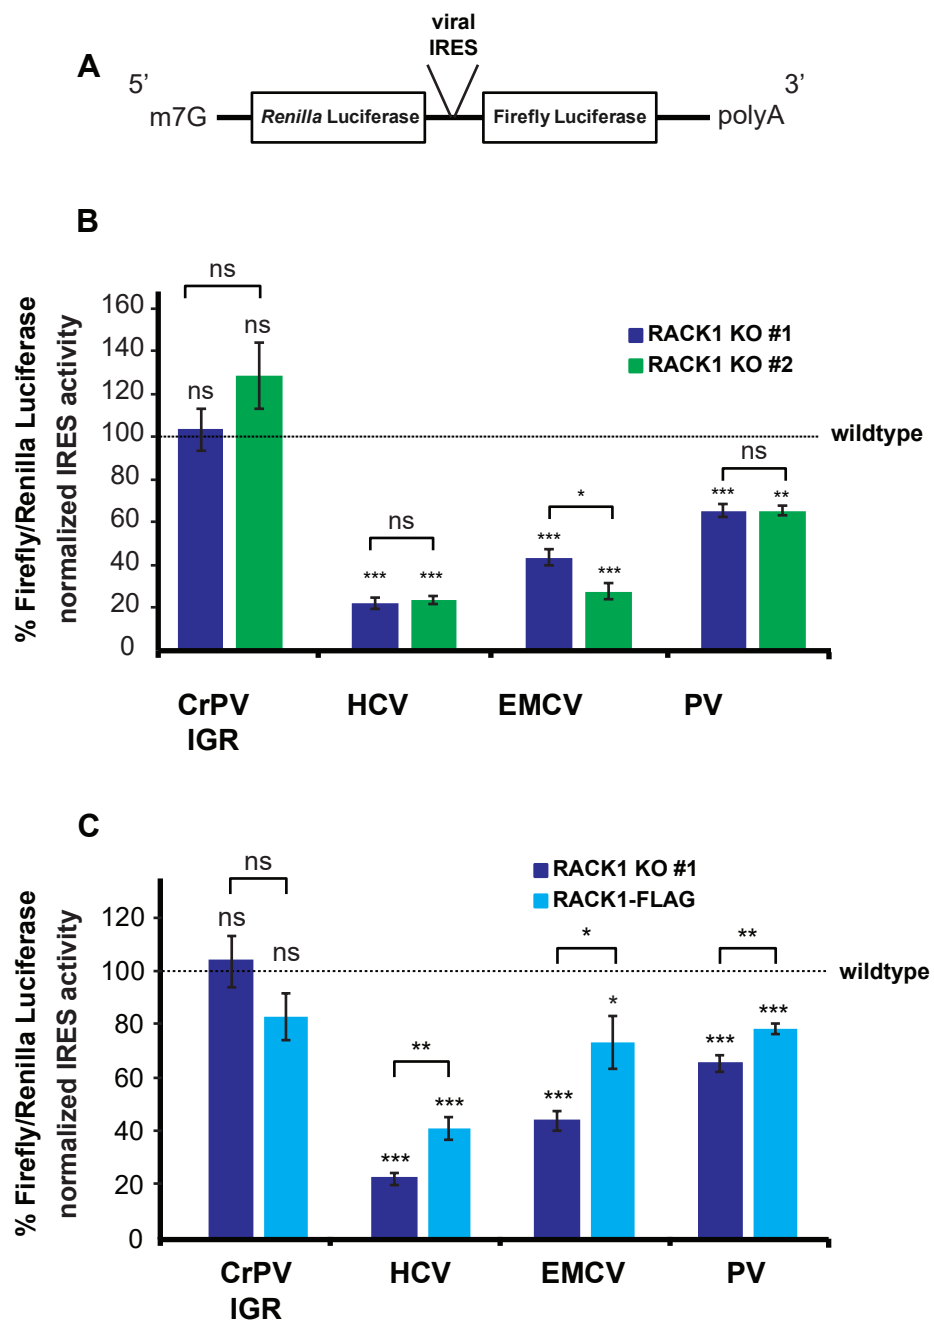



Figure 3

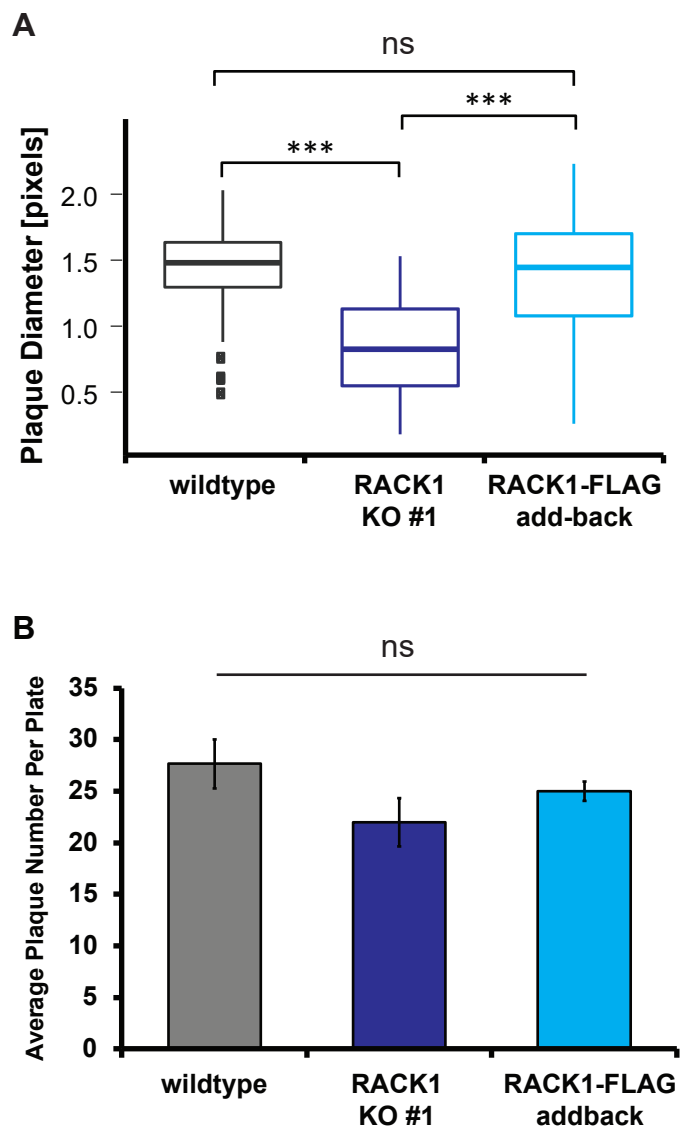

## Figure 4

A

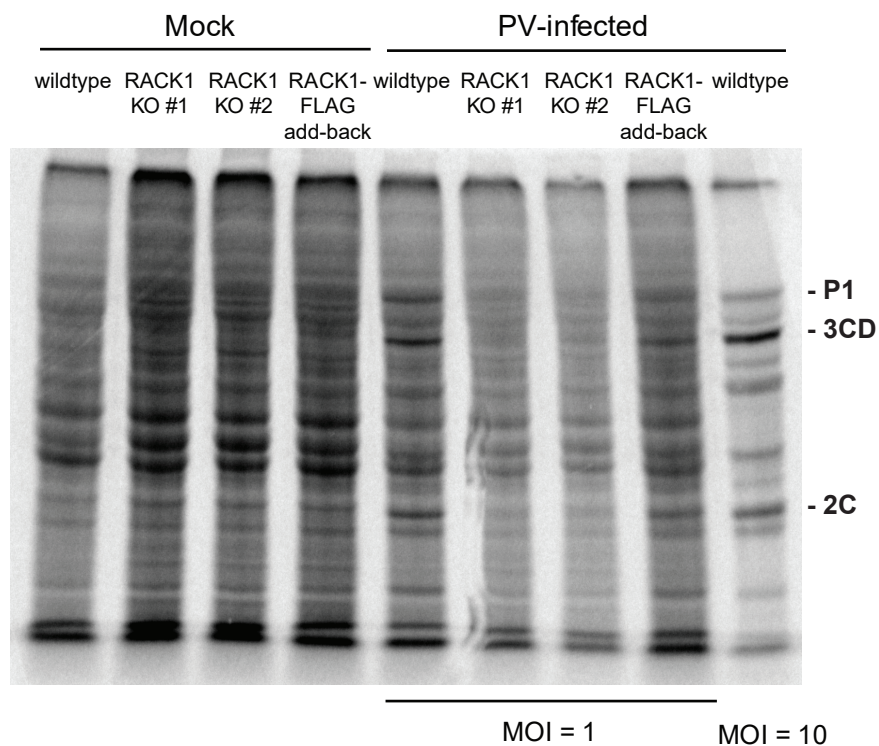

B

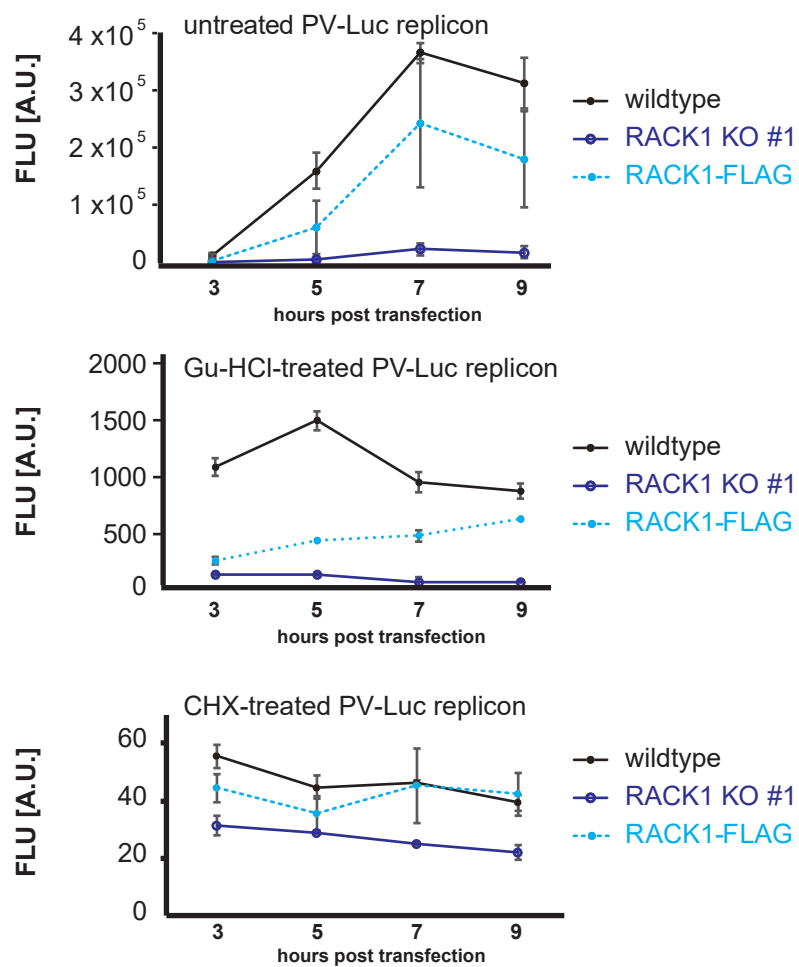

Source: https://www.biorxiv.org/content/10.1101/659185v1.full.pdf
